# Supplementary material
Source: PubMed Central journal article supplement (PMC9635512)
Supplement: ehp11360.smcontents.508.pdf [file ehp11360.smcontents.508.pdf]

**Note to readers with disabilities:** *EHP* strives to ensure that all journal content is accessible to all readers. However, some figures and Supplemental Material published in *EHP* articles may not conform to [508 standards](#) due to the complexity of the information being presented. If you need assistance accessing journal content, please contact [ehp508@niehs.nih.gov](mailto:ehp508@niehs.nih.gov). Our staff will work with you to assess and meet your accessibility needs within 3 working days.

### **Supplemental Material**

#### **Metabolomic, Lipidomic, Transcriptomic, and Metagenomic Analyses in Mice Exposed to PFOS and Fed Soluble and Insoluble Dietary Fibers**

Pan Deng, Jerika Durham, Jinpeng Liu, Xiaofei Zhang, Chi Wang, Dong Li, Taesik Gwag, Murong Ma, and Bernhard Hennig

#### **Table of Contents**

**Table S1.** Open Standard Diet supplemented with cellulose, inulin, or pectin dietary fibers.

**Figure S1.** Metabolomic and lipidomic data analysis workflow.

**Figure S2.** Body weight, food and water intake of male C57BL/6 mice exposed to PFOS and fed with cellulose, inulin or pectin supplemented diet for 7 weeks. A: water intake; B: food intake; C: body weight. Bars represent mean  $\pm$  SEM of 6-8 mice in each group. Detailed data are of body weight, food and water intake are listed in Excel Table S9-10.

**Figure S3.** Heat map analysis of liver samples from mice exposed to PFOS and fed diets supplemented with one of the three fibers: cellulose (control), inulin, or pectin (n=6-8/group). Full metabolomic data are listed in Excel Table S5.

**Figure S4.** Differences in the level of liver metabolites from mice exposed to PFOS and fed diets supplemented with one of the three fibers: cellulose (control), inulin, or pectin (n=6-8/group). MetaboAnalyst 5.0 analysis identified a total of 23 metabolites/compounds that had adjusted  $p < 0.05$  (adj-p) and fold change  $> 2$  after PFOS exposure in control, inulin and pectin fed groups. Log-transformed abundance values are shown as box and whisker plots (midline, median; box limits, upper and lower quartiles; whiskers, 10 th and 90 th percentiles). Data were compared using two-way ANOVA and Tukey test for multiple comparisons, \*  $p < 0.05$ ; \*\*  $p < 0.01$ ; \*\*\*  $p < 0.001$ ; \*\*\*\*  $p < 0.0001$ . Full metabolomic data are listed in Excel Table S5.

**Figure S5.** Relative abundance of *Muribaculum* and *Duncaniella* in mouse cecal contents (Excel Table S7). Mice were exposed to PFOS and fed diets supplemented with one of the three fibers: cellulose (control), inulin, or pectin (n=5/group). Relative abundance values are shown as box and whisker plots (midline, median; box limits, upper and lower quartiles; whiskers, 10 th and 90 th percentiles). Data were analyzed using two-way ANOVA followed by the Tukey's post-hoc test. \*p < 0.05, \*\*p<0.01.

**Additional File-** Excel Document
